# Supplementary material for: Exogenous application of melatonin to mitigate drought stress-induced oxidative damage in Phoebe sheareri seedlings
Source: PeerJ. 2023 Apr 17;11:e15159. doi: 10.7717/peerj.15159 (PMC10117382; doi:10.7717/peerj.15159)
Supplement: Supplemental Information 1 [file peerj-11-15159-s001.xlsx]

## Sheet: fresh biomass
	Number of new leaves (n = 30)	CK	D	M	MD		Relative water content of leaves (n = 3)						Shoot length (n = 30) (cm)	CK	D	M	MD
		8	1	9	5			CK	D	M	MD			8.4	0.4	8.9	2.2
		8	0	10	7			95.26	42.36	93.84	62.36			6.5	0.9	9.1	1.8
		7	0	10	6			93.19	49.95	91.22	66.45			7.2	1.1	6.8	3.1
		6	1	9	3			92.67	51.22	94.47	57.6			6.4	1.5	6.8	3.8
		8	0	8	5		average	93.7067	47.8433	93.1767	62.1367			8.2	1.9	7.4	2.4
		7	2	11	6		SD	1.1187	3.91181	1.40727	3.61645			4.3	0.7	7.8	1.7
		8	1	8	4									5.8	1.1	5.9	0.9
		6	0	7	7									6.9	2.4	9.8	1.7
		5	2	12	6									7.3	2	10.1	2.4
		8	1	13	5									4.6	0.3	6.5	2.9
		7	0	6	3									7.7	1.4	7.5	3.7
		5	0	8	2									8.8	0.7	5.8	3.6
		7	1	9	4									9.1	1.6	8.6	4.1
		9	0	11	5									6.2	2.1	6.4	2.6
		6	2	10	5									7.9	0.8	5.6	2.1
		5	0	6	4									4.3	1.2	7.1	2.3
		7	1	8	3									5.1	1.7	7.5	2.8
		8	1	9	6									6.8	2.1	9.2	3.4
		6	1	10	7									7.2	0.6	9.7	0.9
		4	0	10	5									6.3	2.6	8.3	2.7
		8	1	12	6									5.4	1.6	7.1	3.3
		9	0	8	4									6.7	1.3	5.2	4.4
		5	2	7	3									8.4	1.4	5.7	3.7
		7	0	6	7									9	1.3	8.1	2.8
		8	1	9	5									6.7	0.8	6.4	2.4
		8	1	11	4									7.3	1.7	5	2.6
		7	0	11	6									8.6	1.4	6.3	3.6
		7	0	10	4									8.4	1.6	6.4	2.8
		6	0	8	3									7.5	0.5	7.9	1.9
	n=30	9	2	9	7									4.8	1.6	7.1	1.7
	average	6.96667	0.7	9.16667	4.9								average	6.92667	1.34333	7.33333	2.67667
	SD	1.30341	0.737111	1.79041	1.42244								SD	1.38971	0.581196	1.38211	0.870511
