# Supplementary material for: Exogenous application of melatonin to mitigate drought stress-induced oxidative damage in Phoebe sheareri seedlings
Source: PeerJ. 2023 Apr 17;11:e15159. doi: 10.7717/peerj.15159 (PMC10117382; doi:10.7717/peerj.15159)
Supplement: Supplemental Information 2 [file peerj-11-15159-s002.xlsx]

## Sheet: Car
	CK	1	0.392948	0.379046	0.0238338
		2	0.351525
		3	0.392663
	M	1	0.449835	0.424781	0.0250917
		2	0.399651
		3	0.424858
	D	1	0.23674	0.235394	0.0019031
		2	0.234049
		3	0.335191
	MD	1	0.281022	0.290225	0.00896399
		2	0.298929
		3	0.290723

## Sheet: SOD
		SOD
CK	1	272.59	263.993	16.3068
	2	274.203
	3	245.187
M	1	284.296	278.189	7.78688
	2	269.42
	3	280.85
D	1	212.59	208.418	3.92372
	2	204.802
	3	207.863
MD	1	223.297	225.84	3.19084
	2	229.42
	3	224.802

## Sheet: POD
CK	1	186.667	189.202	8.65739
	2	182.095
	3	198.844
M	1	182.576	192.34	14.7455
	2	209.302
	3	185.143
D	1	134.118	121.141	11.2862
	2	113.609
	3	115.697
MD	1	125.971	140.863	13.2085
	2	151.163
	3	145.455

## Sheet: APX
		APX
CK	1	1.34454	1.35732	0.102294
	2	1.28499
	3	1.42966
M	1	1.92857	1.45841	0.00707107
	2	1.46341
	3	1.45341
D	1	1.2973	0.955656	0.038816
	2	0.928209
	3	0.983103
MD	1	1.48263	1.11879	0.00806187
	2	1.12449
	3	1.11309

## Sheet: PPO
		PPO(u/(g*min))
CK	1	234.375	231.517	2.85823
	2	231.517
	3	228.659
M	1	243.671	243.671	12.71
	2	252.658
	3	234.684
D	1	91.0811	96.4065	5.32538
	2	96.4065
	3	101.732
MD	1	200	195.43	4.56989
	2	195.43
	3	190.86

## Sheet: CAT
			CAT(u/g min)
	CK	1	57.5163	54.6152	3.56678
		2	50.6329
		3	55.6962
	M	1	58	53.3333	4.04741
		2	51.2195
		3	50.7805
	D	1	32.4324	31.7158	1.09375
		2	30.4569
		3	32.2581
	MD	1	46.8919	45.9986	0.834848
		2	45.2381
		3	45.8659

## Sheet: GR
			GR
	CK	1	2.55102	2.67216	0.121138
		2	2.67216
		3	2.7933
	M	1	2.48853	2.46978	0.0162445
		2	2.4604
		3	2.4604
	D	1	1.78571	1.65505	0.130662
		2	1.65505
		3	1.52439
	MD	1	2.06795	2.03253	0.0324806
		2	2.02549
		3	2.00415

## Sheet: MDA
CK	1	0.0257775	0.025934	0.00022138
	2	0.0260905
	3	0.029006
M	1	0.0243426	0.0252617	0.00129976
	2	0.0261807
	3	0.0298867
D	1	0.0316194	0.0545468	0.000630601
	2	0.0549927
	3	0.0541009
MD	1	0.0390952	0.0399802	0.00125162
	2	0.0408652
	3	0.0370027

## Sheet: O2
CK	1	1.47804	1.49772	0.027832
	2	1.5174
	3	1.49772
M	1	1.25747	1.33543	0.0779642
	2	1.41339
	3	1.33543
D	1	1.99747	2.07543	0.110258
	2	2.15339
	3	2.07543
MD	1	1.87695	1.79527	0.0816764
	2	1.79527
	3	1.71359

## Sheet: SP
		SP
CK	1	1.75676	2.39168	0.225615
	2	2.23214
	3	2.55121
M	1	2.28829	2.33704	0.0689419
	2	2.38579
	3	1.819
D	1	3.38676	3.39004	0.159559
	2	3.23214
	3	3.55121
MD	1	2.63125	2.64375	0.036597
	2	2.61504
	3	2.68496

[truncated: 3 more sheets: SS, Pro, hormone]
